# Supplementary material
Source: MDPI journal article supplement (https://www.mdpi.com/2410-3888/8/8/396)
Supplement: s1 [file s1]

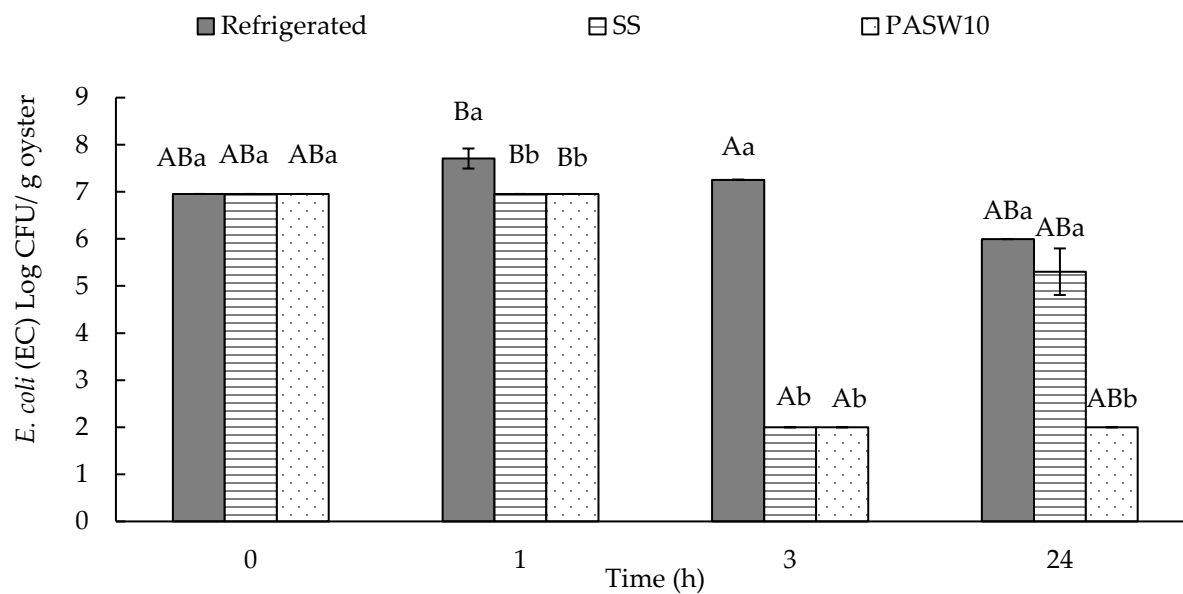

**Figure S2.** The effects of plasma-activated simulated seawater (PASW) on *E. coli* in oysters during static depuration in a preliminary experiment. Data shown are the mean values  $\pm$  standard errors of three replications. Means lacking a common lowercase letter are significantly different ( $p < 0.05$ ) at a specific time point amongst treatments. Means lacking a common uppercase letter are significantly different over the 24 h processing period ( $p < 0.05$ ).
